# Supplementary material for: Multilineage murine stem cells generate complex organoids to model distal lung development and disease
Source: PubMed Central journal article supplement (PMC7604576; doi:10.15252/embj.2019103476), 2020-09-28
Supplement: EMBJ-39-e103476-s002.pdf [file EMBJ-39-e103476-s002.pdf]

## Expanded View Figures

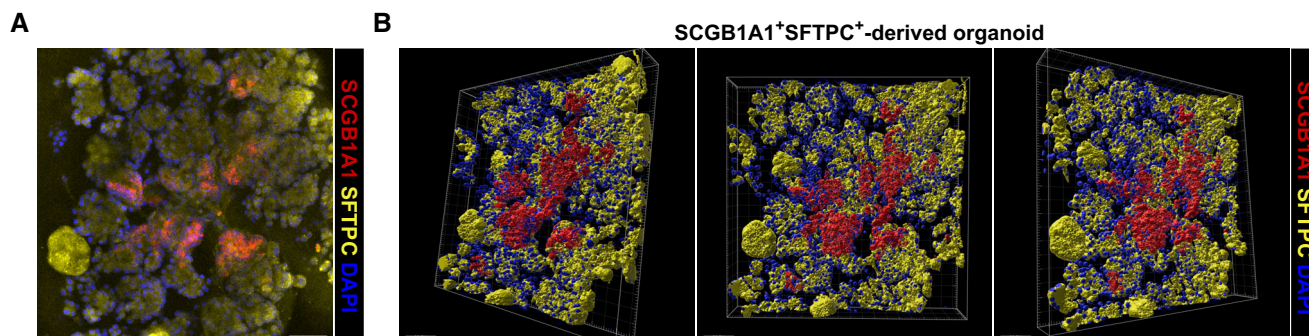

**Figure EV1. 3D reconstruction of BALO depicts proximo-distal cell specification.**

A, B Representative confocal picture (A) and 3D reconstruction (B) of a day 21 culture showing endogenous SCGB1A1 and SFTPC expression within BALO derived from EpCAM<sup>high</sup>CD24<sup>low</sup>Sca-1<sup>+</sup>SCGB1A1<sup>+</sup>SFTPC<sup>+</sup> cells isolated from *Scgb1a1<sup>tmCherry</sup>Sftpc<sup>YFP</sup>* reporter mice. Scale bars represent 50  $\mu$ m.

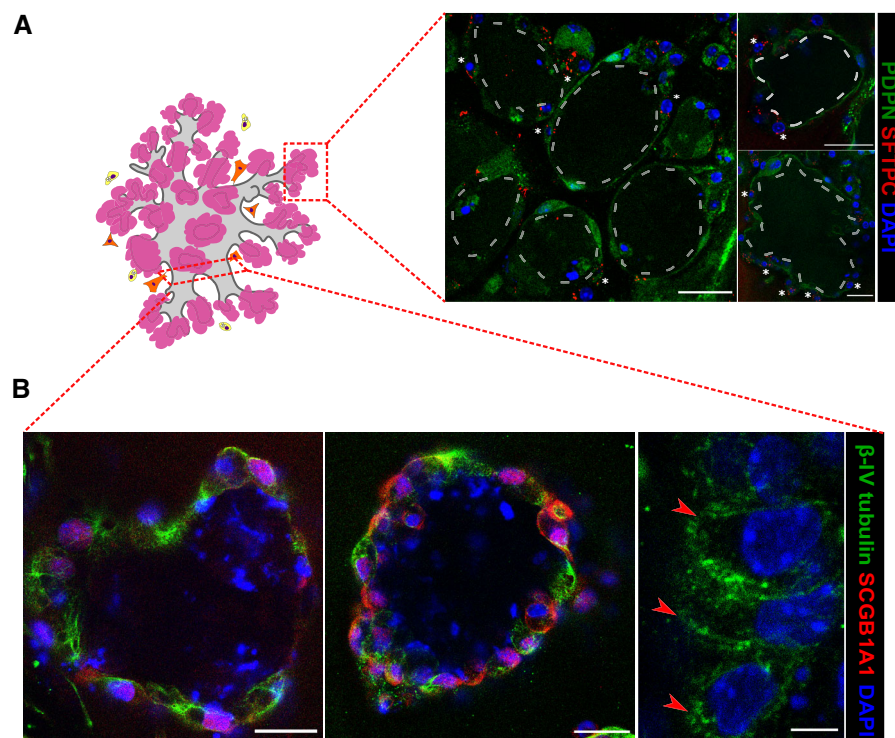

**Figure EV2. BALOs express markers of differentiated airways and alveoli.**

A, B Representative scheme and confocal images of the BALO alveolar-like (A) and airway-like (B) structures. (A) Representative image of AEC II SFTPC staining (white asterisks) and AEC I endogenous PDPN expression in day 28 BALO isolated from the lungs of *Pdpn<sup>GFP</sup>* reporter mice. Scale bars represent 25  $\mu$ m. Dotted lines indicate the alveoli. (B) Representative fluorescence images of BALO's airway-like structures stained for  $\beta$ -IV tubulin<sup>+</sup> ciliated cells (red arrowheads) and SCGB1A1<sup>+</sup> club cells. Scale bars represent 25  $\mu$ m (left and middle) and 5  $\mu$ m (right).
